# Supplementary material
Source: Springer Nature journal article supplement (https://www.springermedizin.de/resource/supplementary/12879_2009_1031_MOESM8_ESM.pdf/9442434)

# Monthly Cholera Cases

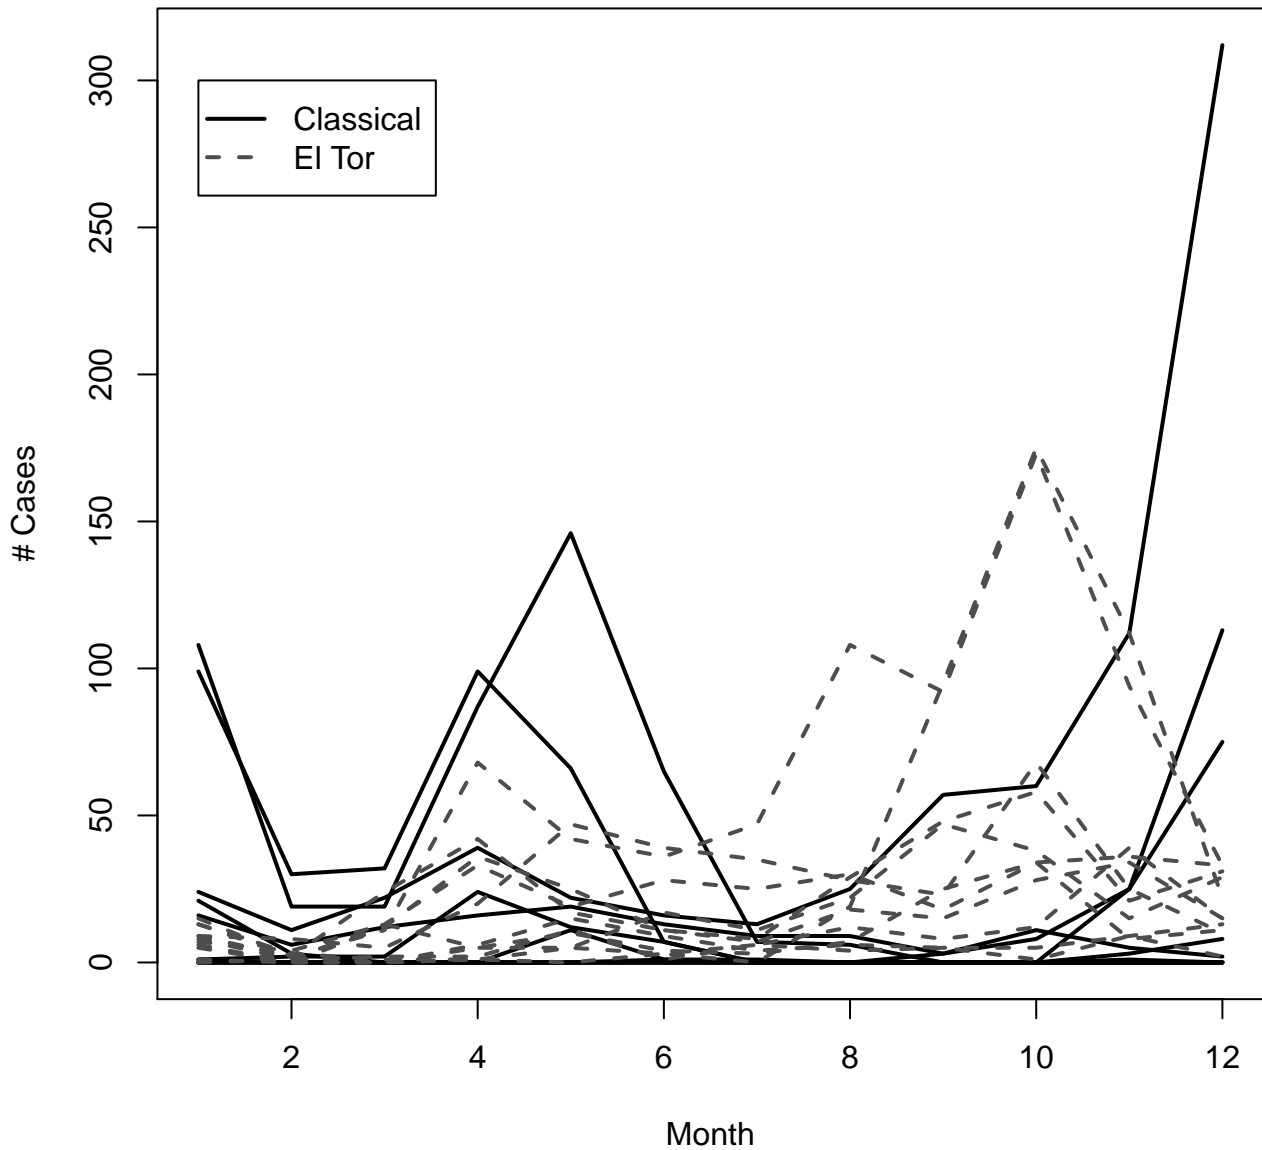

Supplement: MOESM8 [file 9442434]
